# Supplementary material for: SOCS2 is a potential prognostic marker that suppresses the viability of hepatocellular carcinoma cells
Source: PubMed Central journal article supplement — Oncol Lett. 2021 Mar 18;21(5):399. doi: 10.3892/ol.2021.12660 (PMC7988697; doi:10.3892/ol.2021.12660), 2021-03-18
Supplement: Supplementary_Data1.pdf [file Supplementary_Data1.pdf]

Figure S1. PPI network and functional enrichment analysis of the overlapping DEGs. (A) PPI network of proteins encoded by the DEGs and their neighbor genes, including 34 nodes and 251 edges. The node size represents the degree and association of the DEGs. The blue nodes represent 14 DEGs, while the red nodes represent 20 neighbor genes. S100 calcium-binding protein P did not exhibit binding ability with other genes, thus it was not included in the network diagram. (B) Biological process, (C) cellular component and (D) molecular function analyses of the overlapping DEGs. (E) KEGG pathway analysis of the overlapping DEGs. PPI, protein-protein interaction; DEGs, differentially expressed genes; KEGG, Kyoto Encyclopedia of Genes and Genomes.

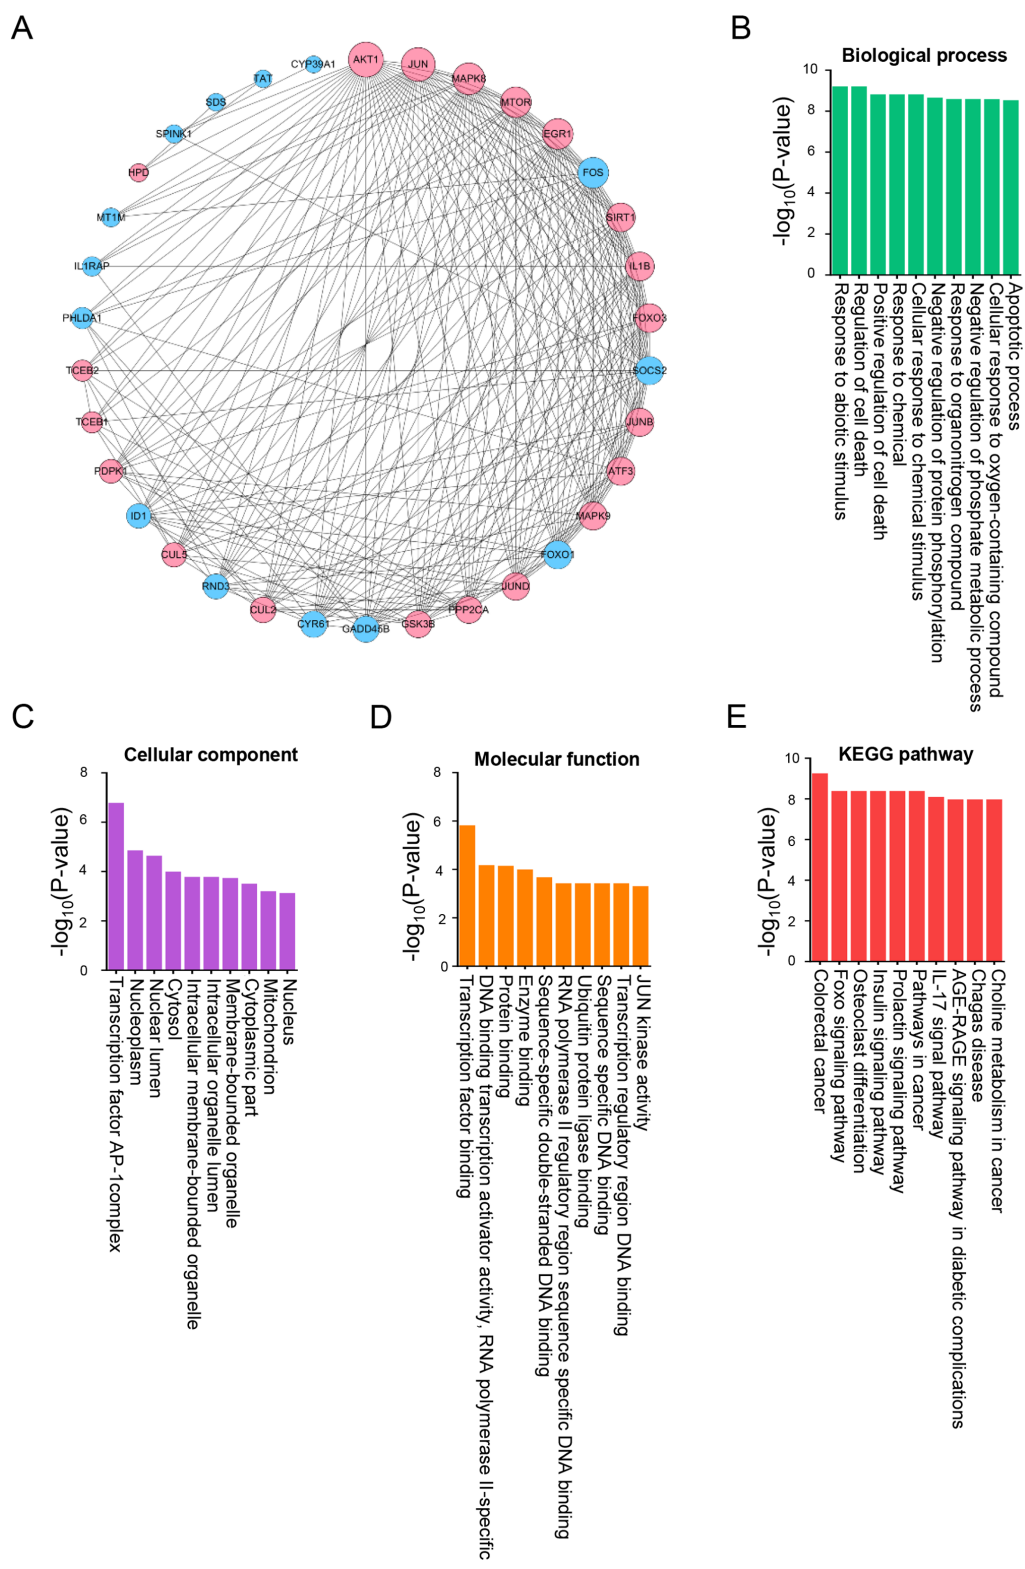

Figure S2. Overall survival analysis of the other 11 differentially expressed genes in patients with hepatocellular carcinoma.

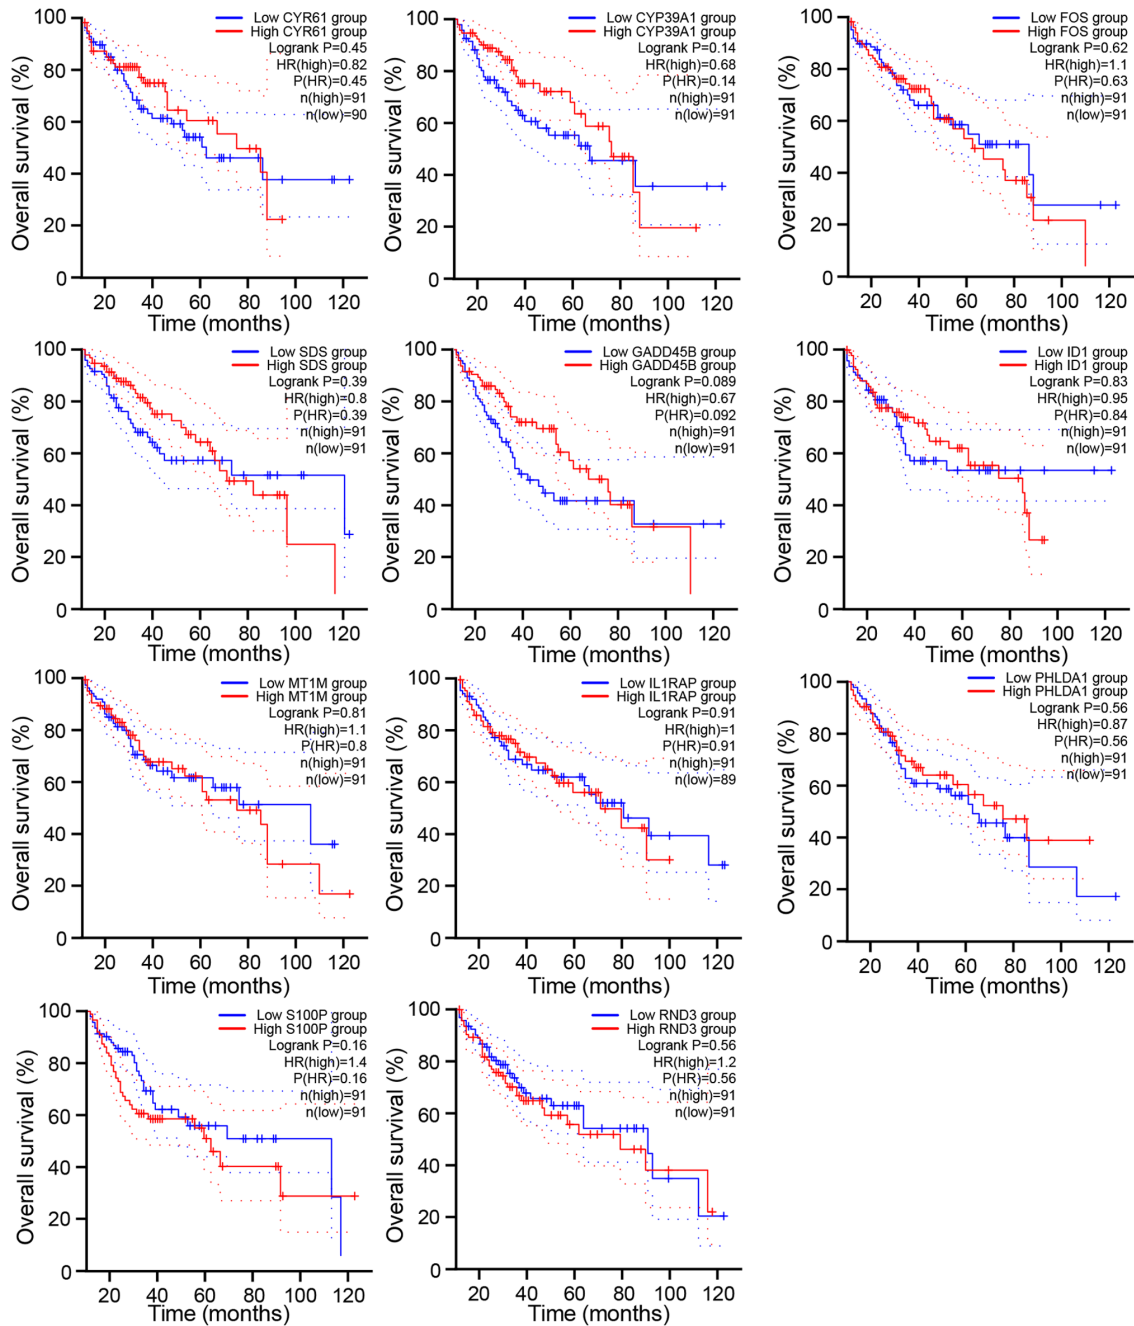

Table SI. Top 10 enriched biological processes.

| Term ID    | Term description                                   | -logFDR  |
|------------|----------------------------------------------------|----------|
| GO:0009628 | Response to abiotic stimulus                       | 9.157391 |
| GO:0010941 | Regulation of cell death                           | 9.157391 |
| GO:0010942 | Positive regulation of cell death                  | 8.769551 |
| GO:0042221 | Response to chemical                               | 8.769551 |
| GO:0070887 | Cellular response to chemical stimulus             | 8.769551 |
| GO:0001933 | Negative regulation of protein phosphorylation     | 8.609065 |
| GO:0010243 | Response to organonitrogen compound                | 8.543634 |
| GO:0045936 | Negative regulation of phosphate metabolic process | 8.543634 |
| GO:1901701 | Cellular response to oxygen-containing compound    | 8.537602 |
| GO:0006915 | Apoptotic process                                  | 8.485452 |

GO, Gene Ontology.

Table SII. Top 10 enriched molecular functions.

| Term ID    | Term description                                                         | -logFDR  |
|------------|--------------------------------------------------------------------------|----------|
| GO:0008134 | Transcription factor binding                                             | 5.782516 |
| GO:0001228 | DNA-binding transcription activator activity, RNA polymerase II-specific | 4.133713 |
| GO:0005515 | Protein binding                                                          | 4.108463 |
| GO:0019899 | Enzyme binding                                                           | 3.958607 |
| GO:1990837 | Sequence-specific double-stranded DNA binding                            | 3.638272 |
| GO:0000977 | RNA polymerase II regulatory region sequence-specific DNA binding        | 3.387216 |
| GO:0031625 | Ubiquitin protein ligase binding                                         | 3.387216 |
| GO:0043565 | Sequence-specific DNA binding                                            | 3.387216 |
| GO:0044212 | Transcription regulatory region DNA binding                              | 3.387216 |
| GO:0004705 | JUN kinase activity                                                      | 3.267606 |

GO, Gene Ontology.

Table SIII. Top 10 enriched cellular components.

| Term ID    | Term description                         | -logFDR  |
|------------|------------------------------------------|----------|
| GO:0035976 | Transcription factor AP-1 complex        | 6.742321 |
| GO:0005654 | Nucleoplasm                              | 4.818156 |
| GO:0031981 | Nuclear lumen                            | 4.603801 |
| GO:0005829 | Cytosol                                  | 3.958607 |
| GO:0043231 | Intracellular membrane-bounded organelle | 3.744727 |
| GO:0070013 | Intracellular organelle lumen            | 3.744727 |
| GO:0043227 | Membrane-bounded organelle               | 3.69897  |
| GO:0044444 | Cytoplasmic part                         | 3.468521 |
| GO:0005739 | Mitochondrion                            | 3.161151 |
| GO:0005634 | Nucleus                                  | 3.091515 |

GO, Gene Ontology.

Table SIV. Top 10 enriched KEGG pathways.

| Term ID  | Term description                                     | -logFDR  |
|----------|------------------------------------------------------|----------|
| hsa05210 | Colorectal cancer                                    | 9.207608 |
| hsa04068 | FoxO signaling pathway                               | 8.333482 |
| hsa04380 | Osteoclast differentiation                           | 8.333482 |
| hsa04910 | Insulin signaling pathway                            | 8.333482 |
| hsa04917 | Prolactin signaling pathway                          | 8.333482 |
| hsa05200 | Pathways in cancer                                   | 8.333482 |
| hsa04657 | IL-17 signaling pathway                              | 8.047208 |
| hsa04933 | AGE-RAGE signaling pathway in diabetic complications | 7.924453 |
| hsa05142 | Chagas disease (American trypanosomiasis)            | 7.924453 |
| hsa05231 | Choline metabolism in cancer                         | 7.924453 |

KEGG, Kyoto Encyclopedia of Genes and Genomes; IL, interleukin.
